# Supplementary material for: Kidney Androgen-Regulated Protein (KAP) Transgenic Mice Are Protected Against High-Fat Diet Induced Metabolic Syndrome
Source: PubMed Central journal article supplement (PMC5701062; doi:10.1038/s41598-017-16487-y), 2017-11-23
Supplement: 41598_2017_16487_MOESM1_ESM.pdf [file 41598_2017_16487_MOESM1_ESM.pdf]

# Kidney Androgen-Regulated Protein (KAP) Transgenic Mice Are Protected Against High-Fat Diet Induced Metabolic Syndrome

Beatriz Bardaji de Quixano<sup>1</sup>, Josep A. Villena<sup>2</sup>, Miguel Aranda<sup>1</sup>, Gemma Brils<sup>1</sup>, Antoni Cuevas<sup>1</sup>, Théana Hespel<sup>1</sup>, Haizea Lekuona<sup>1</sup>, Cristina Suárez<sup>1</sup>, Olga Tornavaca<sup>1</sup>, Anna Meseguer<sup>1,3,4,5</sup>

<sup>1</sup>Fisiopatologia Renal. Centre d'Investigacions en Bioquímica i Biologia Molecular (CIBBIM). Institut de Recerca Vall d'Hebron (VHIR), Barcelona, Spain.

<sup>2</sup>Laboratory of Metabolism and Obesity. Vall d'Hebron Institut de Recerca (VHIR), Barcelona, Spain.

<sup>3</sup>Departament de Bioquímica i Biologia Molecular. Unitat de Bioquímica de Medicina. Universitat Autònoma de Barcelona. Bellaterra (Barcelona) Spain.

<sup>4</sup>Instituto Reina Sofía de Investigación Nefrológica. Fundación Renal Íñigo Álvarez de Toledo. Spain.

<sup>5</sup>Red de Investigación Renal (REDINREN), Instituto Carlos III-FEDER, Madrid, Spain.

Address for correspondence:

Anna Meseguer, Ph.D.

Fisiopatologia Renal. CIBBIM.VHIR.

Pg. Vall d'Hebron 119-129. 08035 Barcelona. SPAIN.

Tel: 34-934894061.

FAX: 34-934894015.

E-mail: [ana.meseguer@vhir.org](mailto:ana.meseguer@vhir.org)

Short Title:

KAP and metabolic syndrome

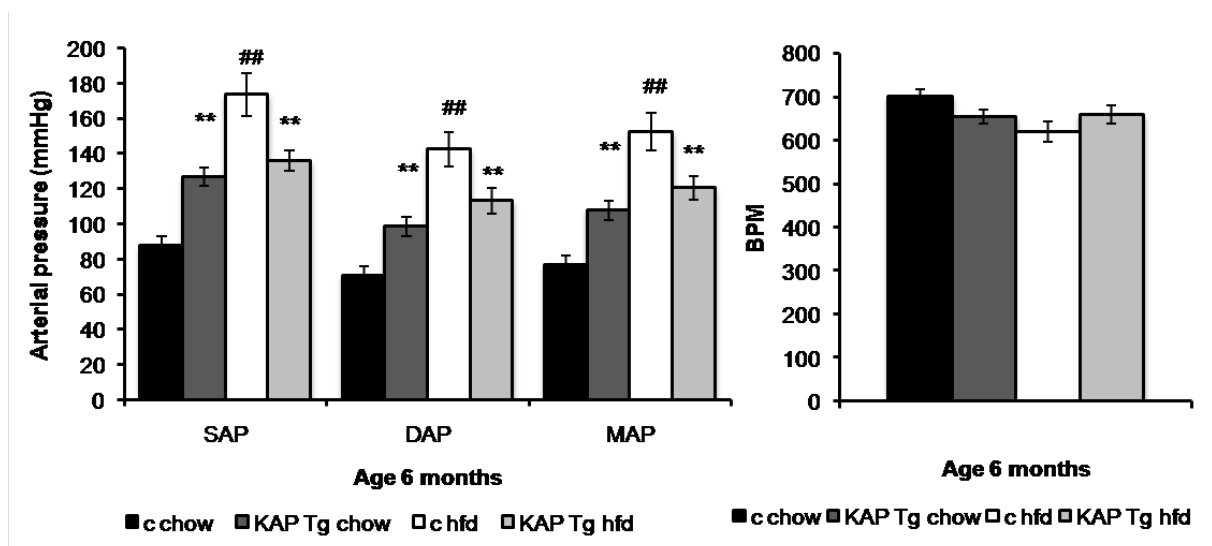

**Figure S1. Hemodynamic analyses**

Evening tail-cuff measurements of systolic (SAP) diastolic (DAP) and mean arterial pressure (MAP) in Tg and control littermate mice fed on standard control diet (chow) or high fat diet (HFD), at 6-month of age (left panel). Mean and SEM from one experiment (n=8 per group) are represented. Statistical analysis on AUC \*\* p<0.01 control vs Tg, ## p<0.01 chow vs HFD. Heart rate measurements in the four groups of mice (right panel). Error bars correspond to SEM.
